# Supplementary material for: Hydrogen bond reinforced, transparent polycaprolactone-based degradable polyurethane
Source: Royal Society of Chemistry journal article supplement (doi:10.1039/d1qm00476j), 2021-01-01
Supplement: d1qm00476j1.pdf [file d1qm00476j1.pdf]

## Supporting Information

### Hydrogen Bond Reinforced, Transparent Polycaprolactone- based Degradable Polyurethane

Qianyun Zhong,<sup>a</sup> Xingxing Chen,<sup>a</sup> Yuxuan Yang,<sup>b</sup> Chenhui Cui,<sup>a</sup> Li Ma,<sup>a</sup> Zhen Li,<sup>a</sup>

Qiang Zhang,<sup>a</sup> Xiaoming Chen,<sup>c</sup> Yilong Cheng<sup>a</sup> and Yanfeng Zhang<sup>\*,a</sup>

<sup>a</sup>School of Chemistry, Xi'an Jiaotong University, Xi'an 710049, China;

<sup>b</sup>Key Laboratory of Shaanxi Province for Craniofacial Precision Medicine Research,  
College of Stomatology, Xi'an Jiaotong University, Xi'an 710049, China;

<sup>c</sup>Micro- and Nanotechnology Research Center, State Key Laboratory for  
Manufacturing Systems Engineering, Xi'an Jiaotong University, Xi'an, Shaanxi,  
710049, China.

\*E-mail addresses: [yanfengzhang@mail.xjtu.edu.cn](mailto:yanfengzhang@mail.xjtu.edu.cn)

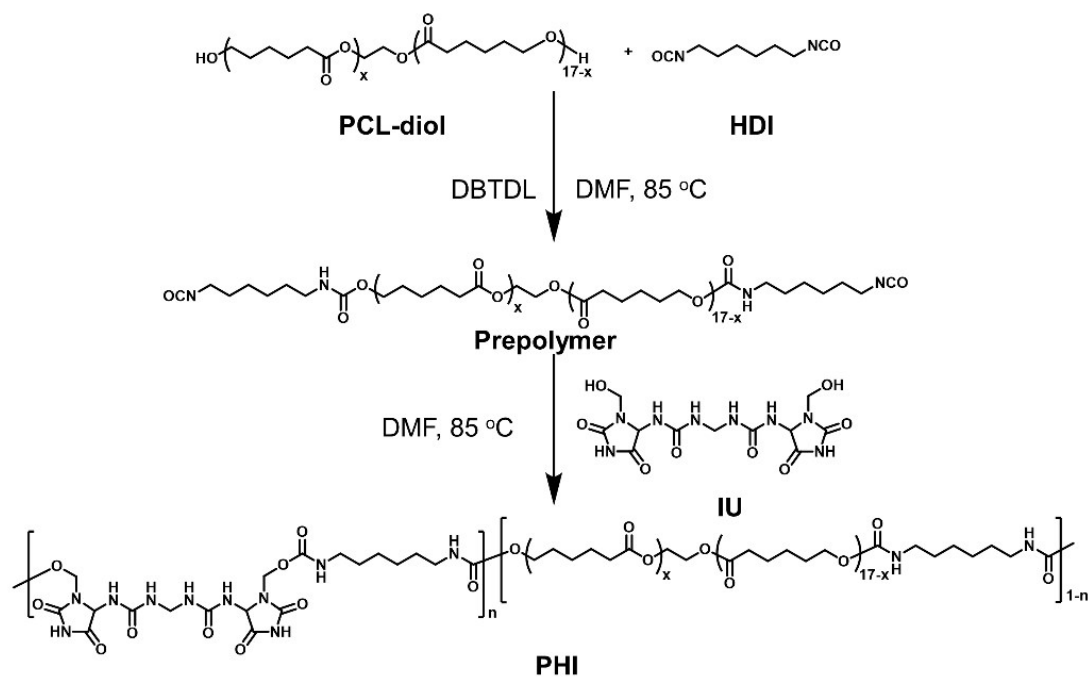

**Figure S1.** Synthetic routes of polymeric elastomers with hierarchical hydrogen bonding.

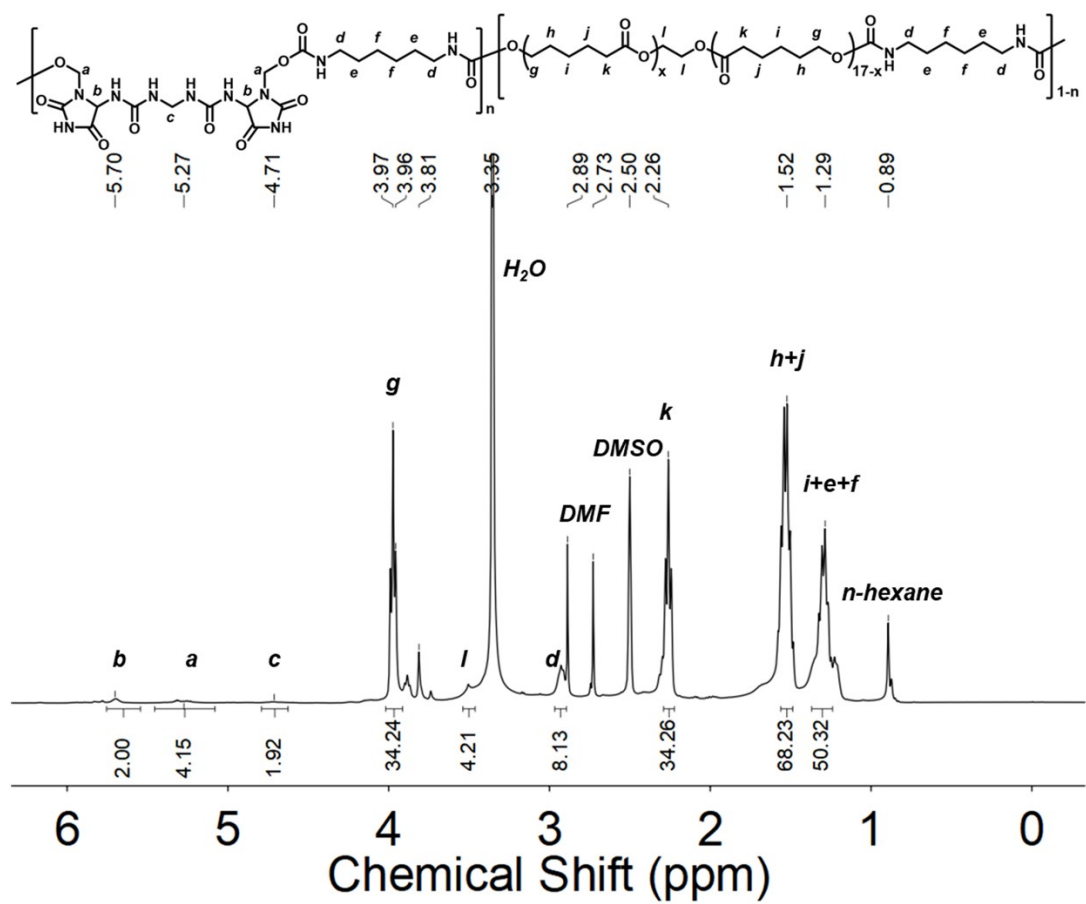

**Figure S2.**  $^1\text{H}$  NMR spectra of sample PHI25.

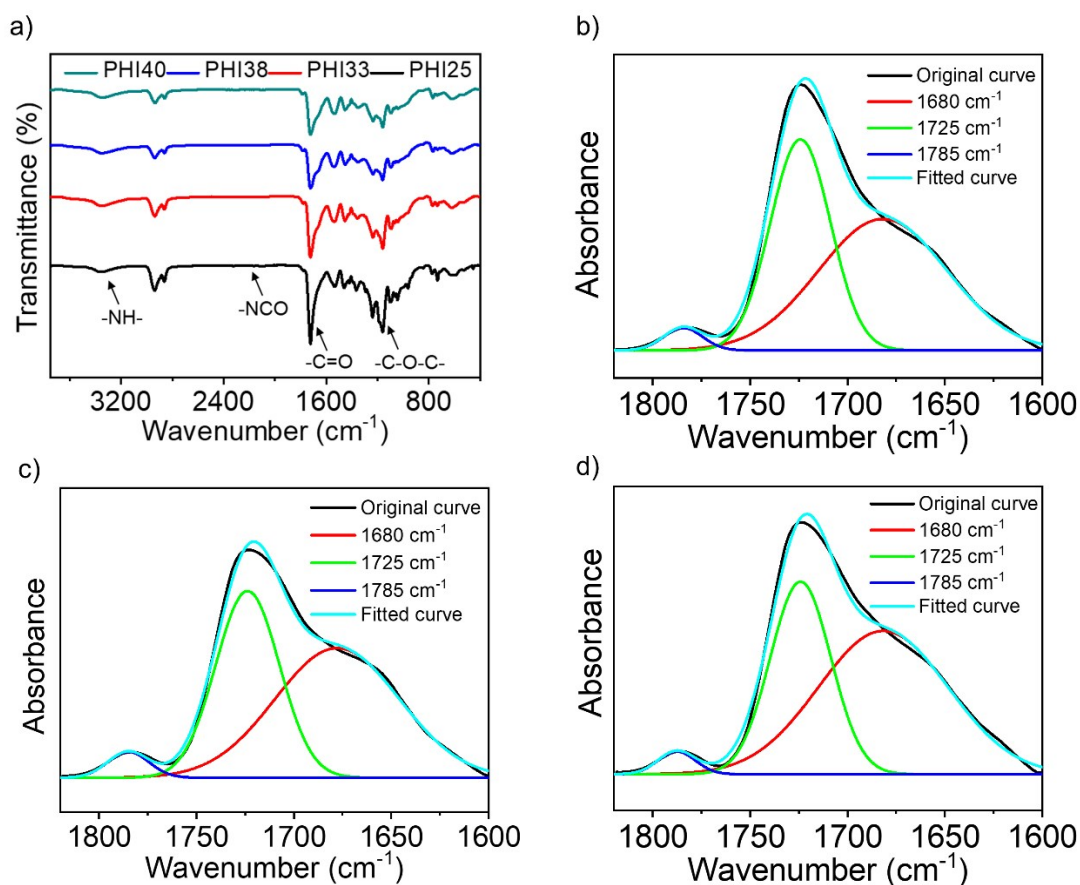

**Figure S3.** FTIR of PHI samples. a) The transmittance of all PHI films. b) The FTIR spectra of PHI33 films fitted by Gauss curves for 1850~1600  $\text{cm}^{-1}$ . c) The FTIR spectra of PHI38 films fitted by Gauss curves for 1850~1600  $\text{cm}^{-1}$ . d) The FTIR spectra of PHI40 films fitted by Gauss curves for 1850~1600  $\text{cm}^{-1}$ .

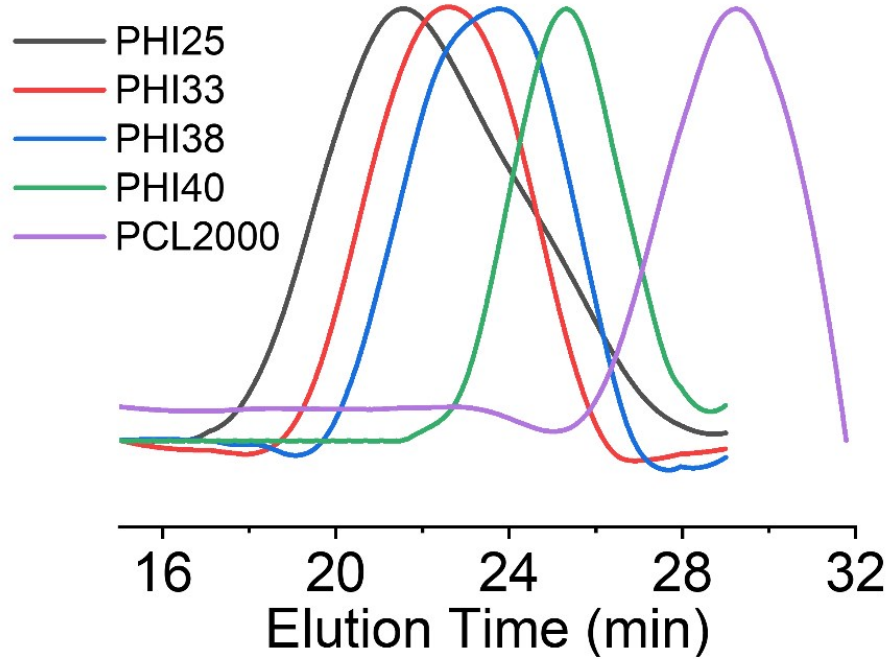

**Figure S4.** GPC curves of all PHI samples.

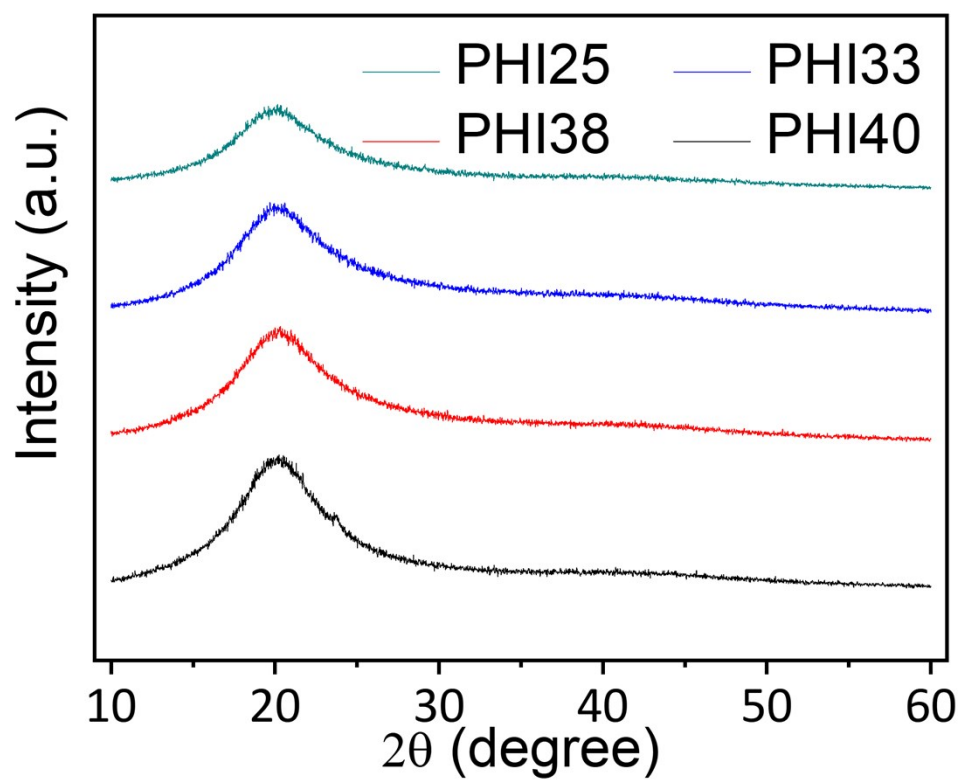

**Figure S5.** XRD curves for all PHI films.

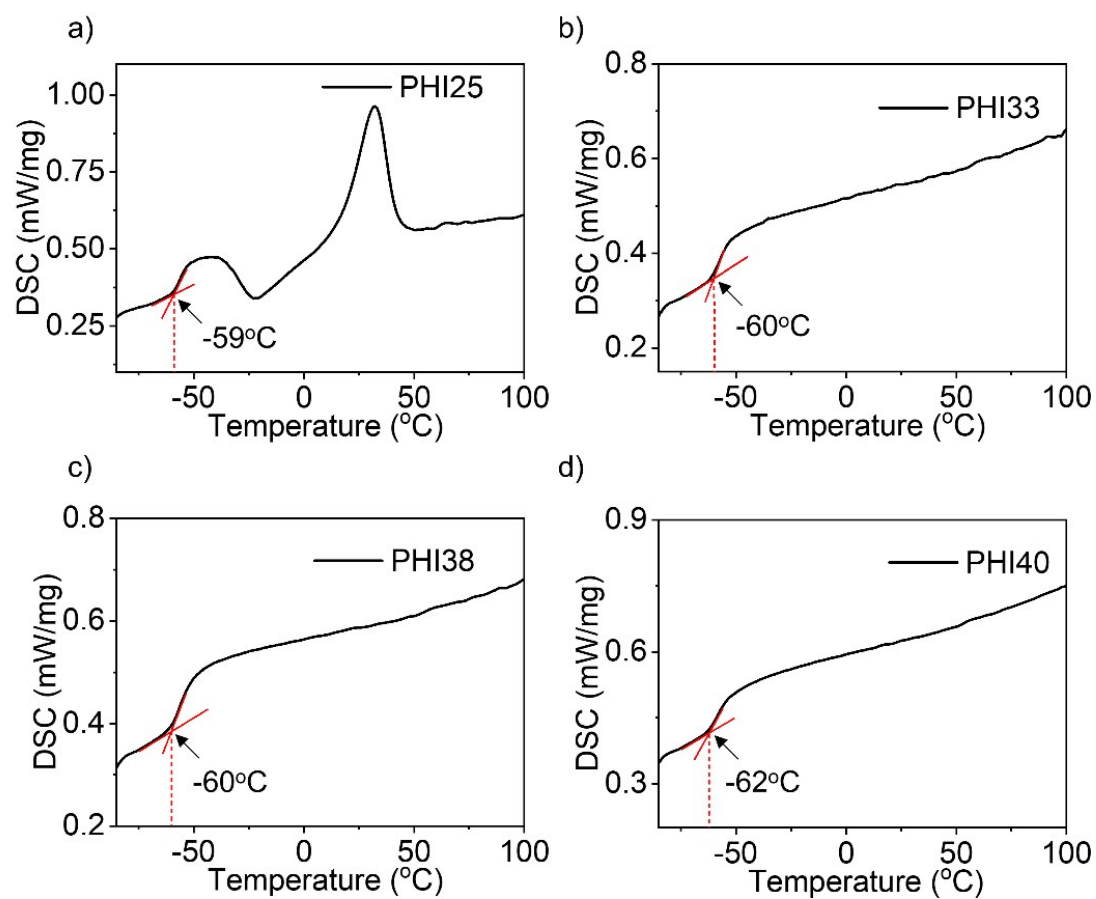

**Figure S6.** DSC of all PHI samples.

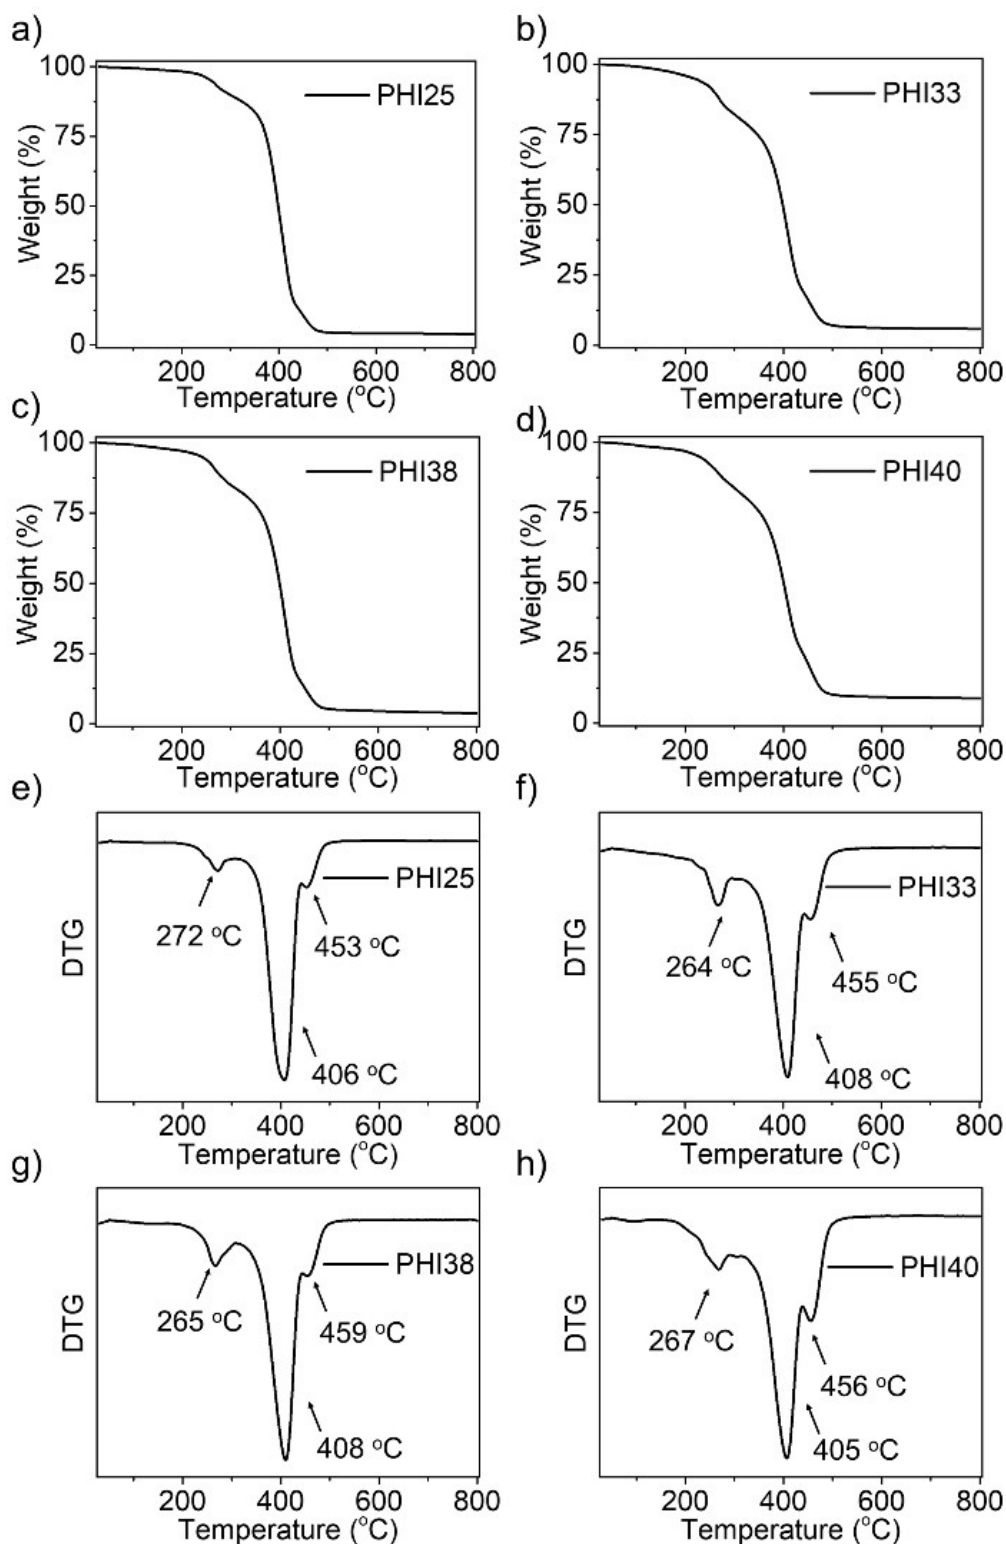

**Figure S7.** TGA of all PHI films. a ~ d) Thermogravimetric analysis of all PHI samples.

e ~ f) DTG curves of all PHI samples.



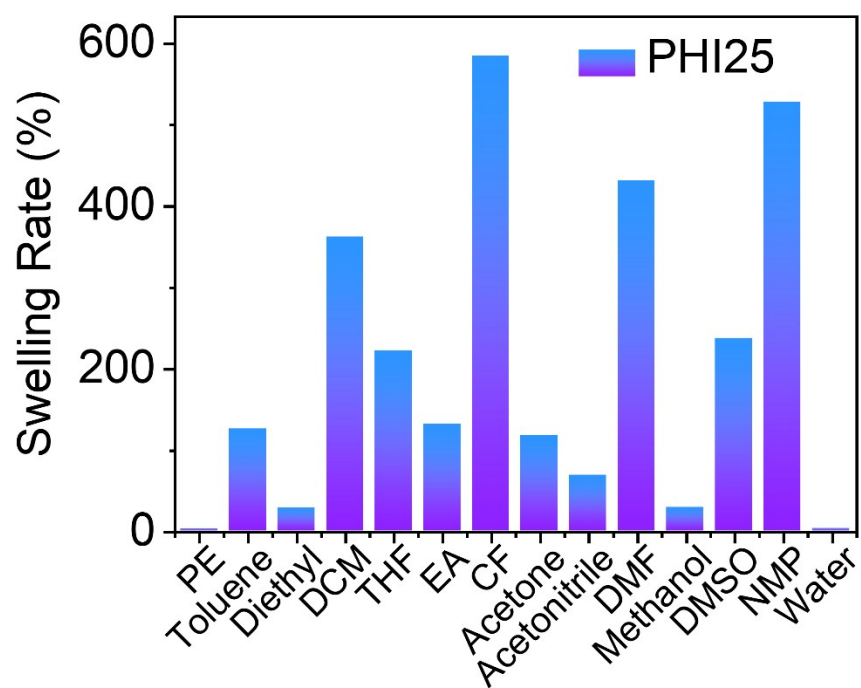

**Figure S8.** Swelling rate of PHI25 films in different polar solvents.

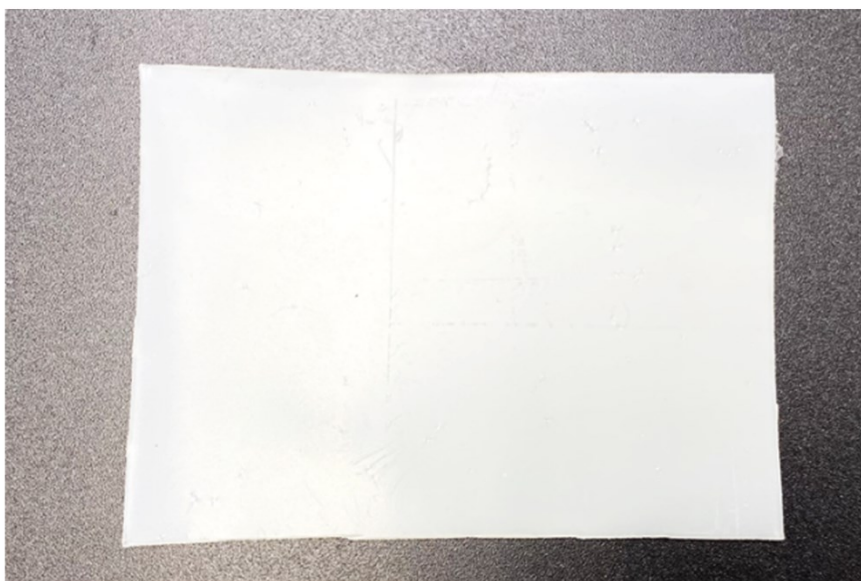

**Figure S9.** The photo of PHI0.

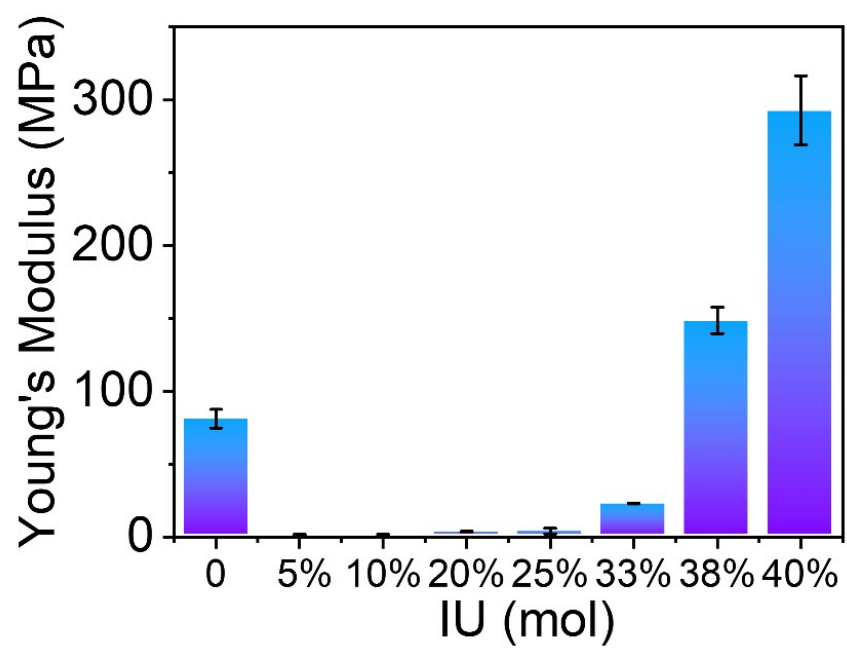

Figure S10. Young's modulus of PHI.

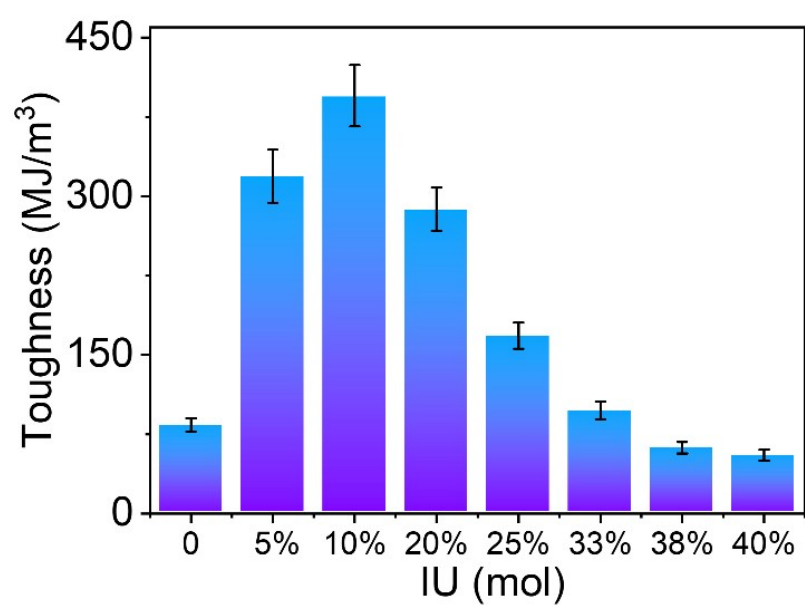

Figure S11. The toughness of PHI samples.

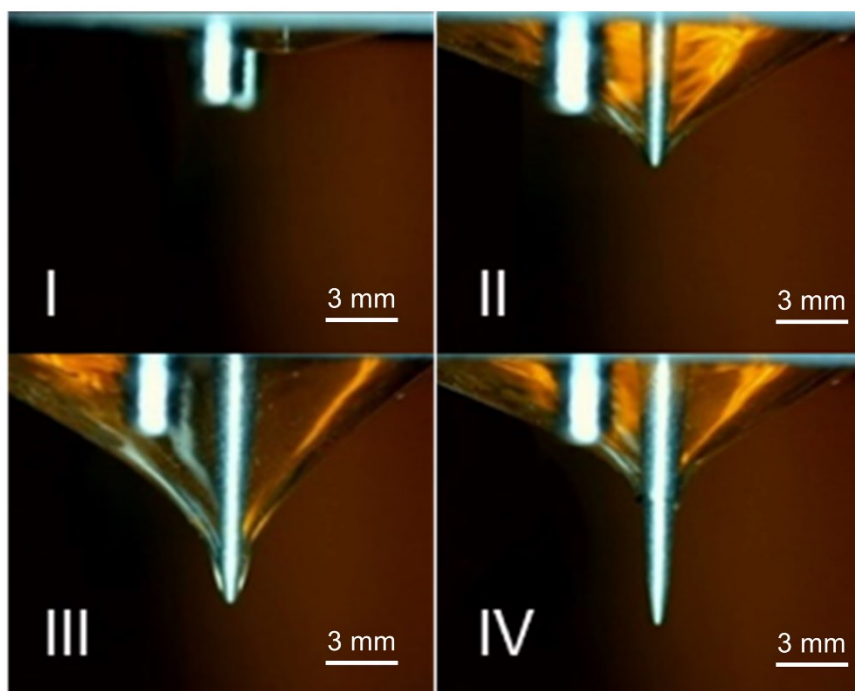

**Figure S12.** Images showing puncture tests of sample PHI25 with different displacements.

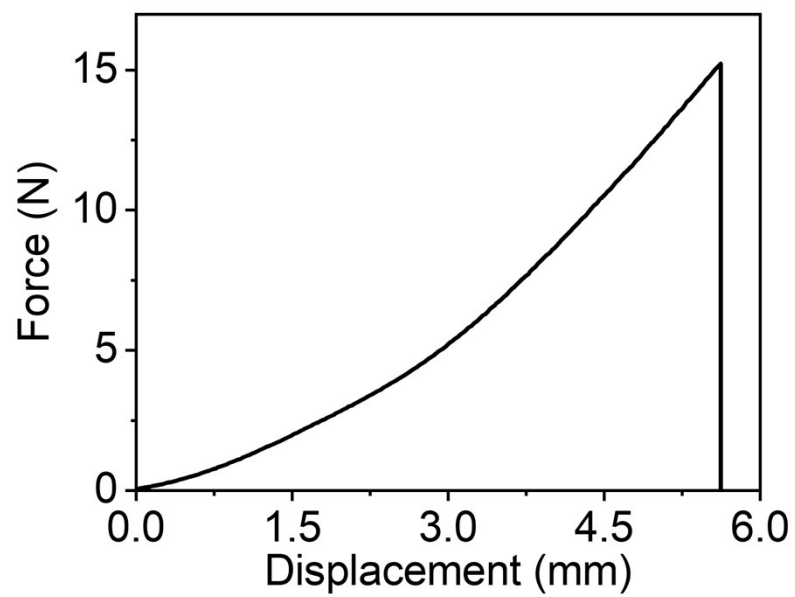

**Figure S13.** Typical puncture force-displacement curve of sample PHI33.

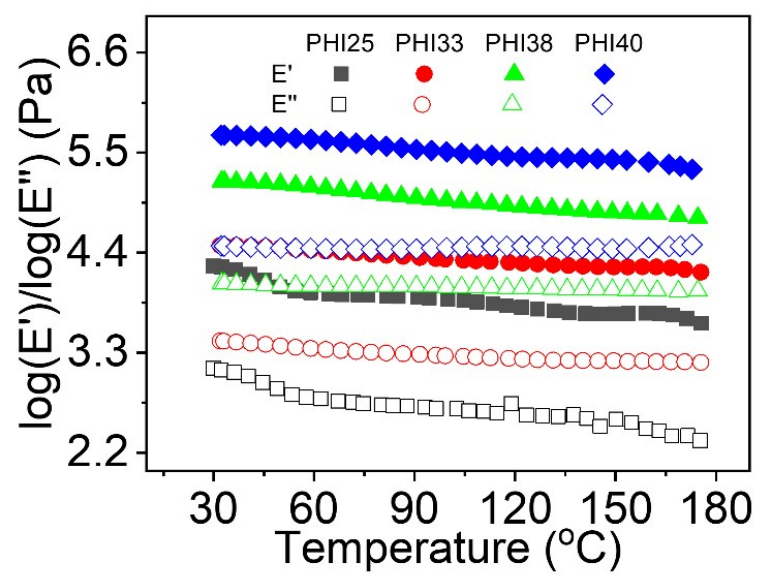

**Figure S14.** Temperature dependence of the storage modulus  $E'$  and the loss modulus  $E''$  of PHI.

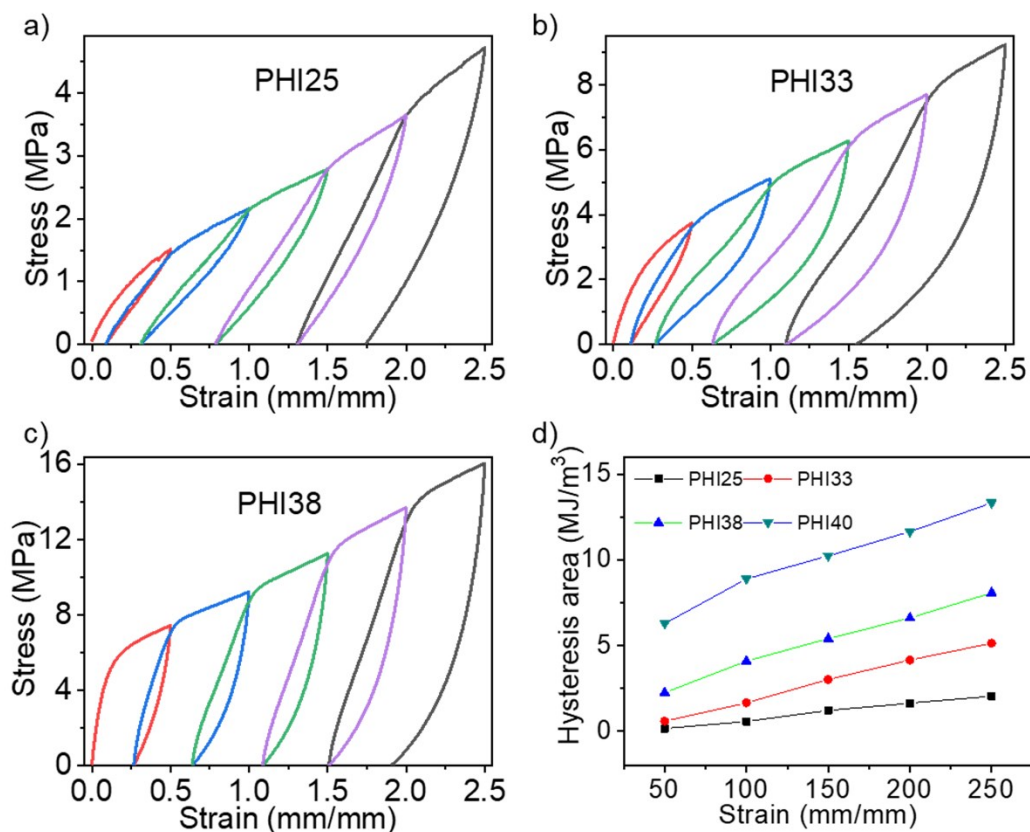

**Figure S15.** Step-cycle tensile deformation. a~c) Loading-unloading curves of samples PHI25~PHI38 under different strains. d) Dissipated energy during loading-unloading processes under different strains.



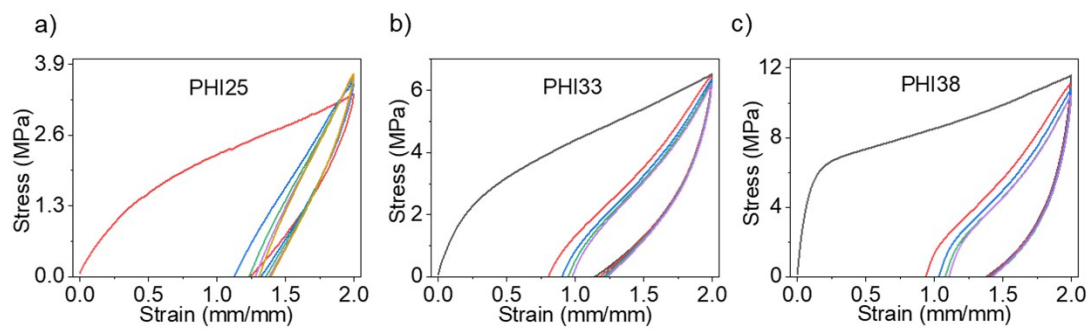

**Figure S16.** Five successive loading-unloading cycles with 200% strain of samples PHI25~PHI38.

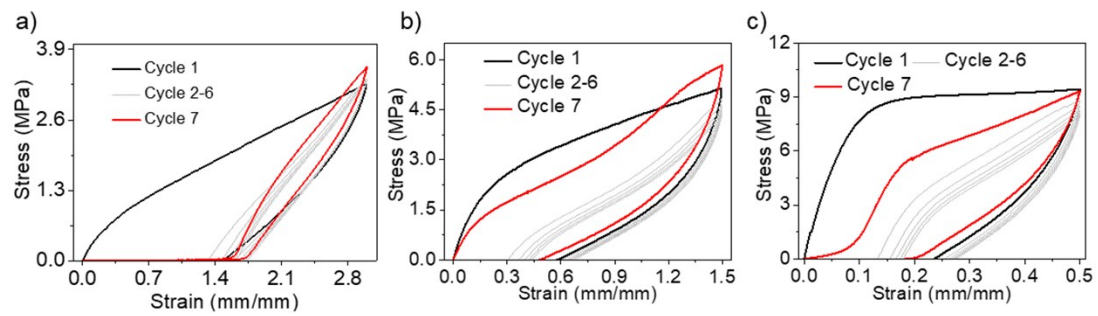

**Figure S17.** Cyclic tensile test curves in successive cycles of samples PHI25~PHI38.

The loading-unloading cycle 7 was delayed for 2 h after cycle 6.

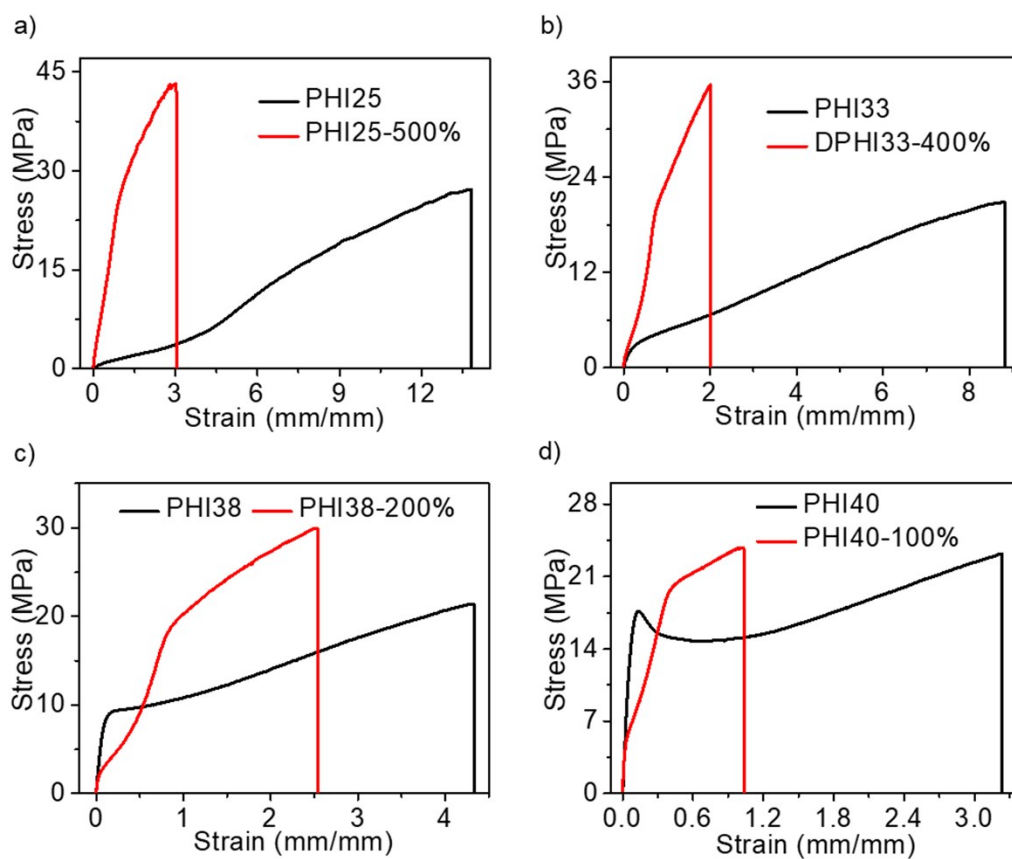

**Figure S18.** Monotonic stress-strain curves of stretch-reinforced elastomer. The black line is the curve of pristine sample and the red line is the sample deformed to a different strain.

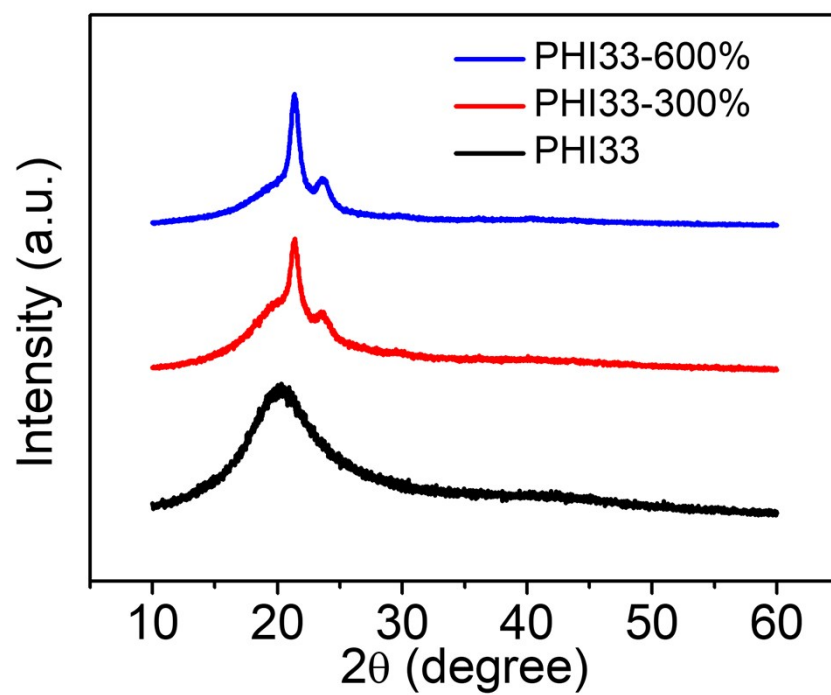

**Figure S19.** Wide-angle X-ray scattering of sample PHI33 at different deformation.

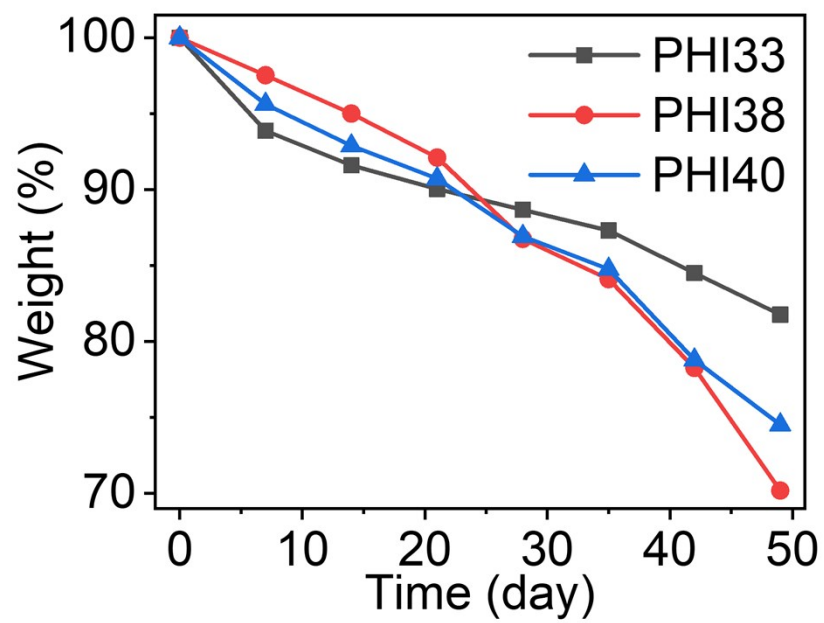

**Figure S20.** The degradation curves of all samples.

**Table S1.** Synthesis parameters of PHI.

| Sample  | PCL2000<br>(mol) | HDI<br>(mol) | IU<br>(mol) | IU<br>(mol%) | Mn<br>(KDa) | Mw<br>(KDa) | PDI |
|---------|------------------|--------------|-------------|--------------|-------------|-------------|-----|
| PHI25   | 1                | 2            | 1           | 25           | 31.6        | 41.1        | 1.3 |
| PHI33   | 1                | 3            | 2           | 33           | 24.7        | 29.6        | 1.2 |
| PHI38   | 1                | 4            | 3           | 38           | 19.3        | 23.2        | 1.2 |
| PHI40   | 1                | 5            | 4           | 40           | 11.8        | 13.0        | 1.1 |
| PCL2000 | /                | /            | /           | /            | 2.0         | 2.2         | 1.1 |

**Table S2.** Mechanical properties of PHI samples.

| IU/mol% | Modulus<br>(MPa) | Breaking<br>Strength<br>(MPa) | Breaking<br>Strain<br>(mm/mm) | Toughness<br>(MJ/m <sup>3</sup> ) |
|---------|------------------|-------------------------------|-------------------------------|-----------------------------------|
| 25      | 4.1 ± 1.9        | 24.9 ± 2.3                    | 13.8 ± 0.2                    | 168.2 ± 22.1                      |
| 33      | 23.0 ± 0.2       | 19.9 ± 0.9                    | 8.4 ± 0.6                     | 97.5 ± 11.2                       |
| 38      | 148.7 ± 9.0      | 21.1 ± 0.8                    | 4.1 ± 0.2                     | 62.2 ± 4.2                        |
| 40      | 293.0 ± 23.6     | 19.8 ± 4.3                    | 3.3 ± 0.4                     | 55.2 ± 6.6                        |

**Table S3.** Mechanical properties of sample PHI25 with different pre-stretched deformation.

| Deformation<br>mm/mm | Original<br>Length<br>(mm) | The Length<br>of Residual<br>Deformation<br>(mm) | Modulus<br>(MPa) | Breaking<br>Strength<br>(MPa) | Breaking<br>Strain<br>(mm/mm) |
|----------------------|----------------------------|--------------------------------------------------|------------------|-------------------------------|-------------------------------|
| 0                    | 16.00                      | 16.00                                            | $4.1 \pm 1.9$    | $24.9 \pm 2.3$                | $13.8 \pm 0.2$                |
| 200%                 | 16.00                      | $25.15 \pm 1.99$                                 | $4.1 \pm 0.4$    | $23.1 \pm 1.1$                | $7.4 \pm 0.9$                 |
| 400%                 | 16.00                      | $58.69 \pm 2.14$                                 | $25.8 \pm 3.0$   | $35.9 \pm 5.3$                | $2.4 \pm 0.4$                 |
| 600%                 | 16.00                      | $70.52 \pm 8.73$                                 | $49.9 \pm 12.0$  | $48.5 \pm 5.7$                | $2.0 \pm 0.7$                 |



**Table S4.** Mechanical properties of PHI samples with different deformation rates.

| Sample     | Modulus<br>(MPa) | Breaking<br>Strength<br>(MPa) | Breaking<br>Strain<br>(mm/mm) | Toughness<br>(MJ/m <sup>3</sup> ) |
|------------|------------------|-------------------------------|-------------------------------|-----------------------------------|
| PHI25      | 4.1 ± 1.9        | 24.9 ± 2.3                    | 13.8 ± 0.2                    | 168.2 ± 22.1                      |
| PHI25-500% | 34.6 ± 0.3       | 43.9 ± 4.1                    | 3.0 ± 0.3                     | 88.7 ± 0.8                        |
| PHI33      | 23.0 ± 0.2       | 19.9 ± 0.9                    | 8.4 ± 0.6                     | 97.5 ± 11.2                       |
| PHI33-400% | 47.5 ± 0.8       | 34.5 ± 1.2                    | 2.1 ± 0.08                    | 42.4 ± 0.01                       |
| PHI38      | 148.7 ± 9.0      | 21.1 ± 0.8                    | 4.1 ± 0.2                     | 62.2 ± 4.2                        |
| PHI38-200% | 103.4 ± 6.0      | 26.8 ± 3.2                    | 2.3 ± 0.2                     | 50.0 ± 0.4                        |
| PHI40      | 293.0 ± 23.6     | 19.8 ± 4.3                    | 3.3 ± 0.4                     | 55.2 ± 6.6                        |
| PHI40-100% | 253.9 ± 7.6      | 22.4 ± 1.4                    | 1.1 ± 0.1                     | 18.5 ± 0.2                        |

**Video S1.** Puncture Test of PHI. (MP4)
